# Supplementary material
Source: publisher figshare collection journal article supplement (https://tandf.figshare.com/ndownloader/files/22116780)
Supplement: Supplementary file 1 [file 22116780]

**Table 1. Patients lost from the study**

| **Reason** | **Number of lost Group** | | | |
| --- | --- | --- | --- | --- |
| **Fenofibrate** | Gender ***(M/F)*** | **CoA** | Gender ***(M/F)*** |
| Lost contact | 1 | 0/1 | 1 | 0/1 |
| Poor compliance* | 1 | 1/0 | 2 | 1/1 |
| Adverse events | 11 | 7/4 | 5 | 2/3 |
| Withdrawing consent | 7 | 3/4 | 9 | 4/5 |
| Total | 20 | 11/9 | 17 | 7/10 |

* Patients were considered non-compliant if they used <80% of the prescribed number of capsules.CoA: Coenzyme A; All p > 0.05
